# Supplementary material
Source: HighWire-hosted journal article supplement (https://www.annals.org/content/suppl/2006/10/16/0000605-200612190-00143v1)
Supplement: M61704.01_Figure.pdf [file M61704.01_Figure.pdf]

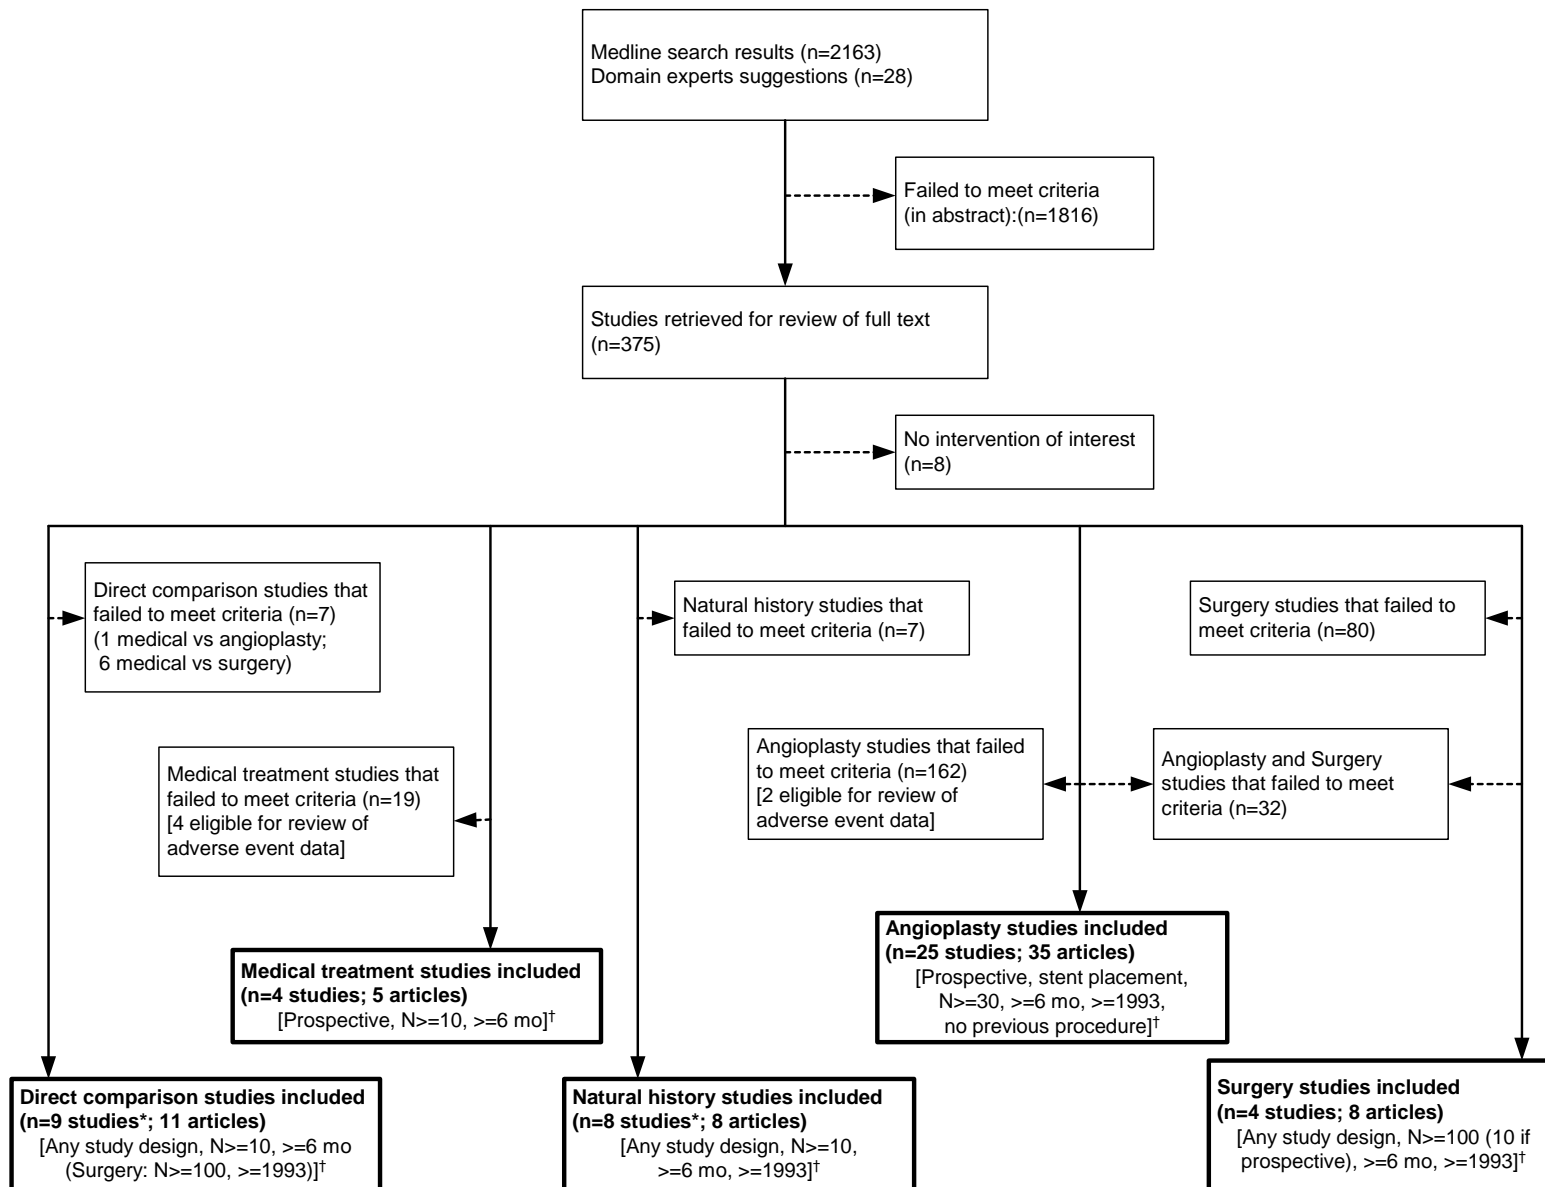

\* One study had data for both direct comparison of medical treatment to angioplasty and of natural history.

† Intervention-specific study-eligibility criteria.
