# Supplementary material
Source: HighWire-hosted journal article supplement (https://www.annals.org/content/suppl/2006/10/16/0000605-200612190-00143v1)
Supplement: M61704.05_T1.pdf [file M61704.05_T1.pdf]

Table 1. Summary of Reviewed Studies

| Study Type          | Intervention                                                                                                              | Studies,<br><i>n</i> | Quality, <i>n</i> |      |      | Applicability, <i>n</i> |          |      | Participants, Years of<br>Intervention |
|---------------------|---------------------------------------------------------------------------------------------------------------------------|----------------------|-------------------|------|------|-------------------------|----------|------|----------------------------------------|
|                     |                                                                                                                           |                      | Good              | Fair | Poor | High                    | Moderate | Low  |                                        |
| Randomized trials   | Angioplasty with stent placement versus medical therapy                                                                   | 0                    |                   |      |      |                         |          |      |                                        |
| Randomized trials   | Angioplasty without stent placement or combination of angioplasty with and without stent placement versus medical therapy | 2*                   | 2                 |      |      | 1                       | 1        | 103  | 1992–1995‡                             |
| Comparison studies† | Revascularization versus medical therapy <sup>8</sup> *                                                                   |                      | 2                 | 6    | 1    |                         | 7        | 597  | 1981–2003‡                             |
| Cohort studies      | Medical treatment                                                                                                         | 4                    | 1                 | 3    |      | 1                       | 3        | 83   | Not reported                           |
| Cohort studies      | Natural history                                                                                                           | 8                    | 3                 | 5    |      | 3                       | 5        | 721  | 1970–1998‡                             |
| Cohort studies      | Angioplasty with stent placement                                                                                          | 21                   | 10                | 11   | 2    | 14                      | 5        | 3368 | 1989–2002‡                             |

| Study Type                           | Intervention                                 | Studies,<br><i>n</i> | Quality, <i>n</i> |      |      | Applicability, <i>n</i> |          |      | Participants, Years of<br>Intervention |
|--------------------------------------|----------------------------------------------|----------------------|-------------------|------|------|-------------------------|----------|------|----------------------------------------|
|                                      |                                              |                      | Good              | Fair | Poor | High                    | Moderate | Low  |                                        |
| Cohort studies                       | Angioplasty with and without stent placement | 4                    | 3                 | 1    | 1    | 2                       | 1        | 427  | 1993–1999                              |
| Cohort studies                       | Surgical revascularization                   | 4                    |                   | 4    |      |                         | 4        | 921  | 1980–2004                              |
| Studies that reported adverse events |                                              | 37                   |                   |      |      |                         |          | 5378 |                                        |

\*One study had both a randomized and nonrandomized component.

†Combination angioplasty and surgery or surgery versus medical therapy (randomized or nonrandomized study), or angioplasty versus medical therapy in a nonrandomized study.

‡Some studies did not report the intervention years.
