# Supplementary material
Source: HighWire-hosted journal article supplement (https://www.annals.org/content/suppl/2006/10/16/0000605-200612190-00143v1)
Supplement: M61704.05_T3.pdf [file M61704.05_T3.pdf]

**Table 3. Direct Comparisons of Angioplasty or Surgery and Medical Treatment for Renal Artery Stenosis\***

| Author, Year<br>(Reference)                 | Study<br>Design     | Intervention                          | Patients<br>with Renal<br>Artery<br>Stenosis<br>(Patients<br>with<br>Atheroscle<br>rotic Renal<br>Artery<br>Stenosis),<br><i>n</i> | Mean<br>Blood<br>Pressure,<br><i>mm Hg</i> | Mean<br>Glomerular<br>Filtration Rate,<br><i>mL/s (mL/min)</i> | Mean<br>Serum Creatinine<br>Concentration<br><i>μmol/L (mg/dL)</i> | Mean Degree<br>of Stenosis<br>(Patients<br>with Bilateral<br>Stenosis), % | Location<br>of<br>Stenosis<br>(Patients),<br>% | Years in<br>Which<br>Patients<br>Were<br>Enrolled | Mean<br>Study<br>Duration<br>(Range) | Results                  | Quality                                                                   | Applicability |          |
|---------------------------------------------|---------------------|---------------------------------------|------------------------------------------------------------------------------------------------------------------------------------|--------------------------------------------|----------------------------------------------------------------|--------------------------------------------------------------------|---------------------------------------------------------------------------|------------------------------------------------|---------------------------------------------------|--------------------------------------|--------------------------|---------------------------------------------------------------------------|---------------|----------|
|                                             |                     |                                       |                                                                                                                                    |                                            |                                                                |                                                                    |                                                                           |                                                |                                                   |                                      | Blood Pressure           | Kidney<br>Function                                                        |               |          |
| <b>Angioplasty versus medical treatment</b> |                     |                                       |                                                                                                                                    |                                            |                                                                |                                                                    |                                                                           |                                                |                                                   |                                      |                          |                                                                           |               |          |
| Webster et al., 1998 (10)                   |                     |                                       |                                                                                                                                    |                                            |                                                                |                                                                    |                                                                           |                                                |                                                   |                                      |                          |                                                                           |               |          |
| Patients<br>with<br>bilateral<br>disease    | Randomized<br>trial | Angioplasty,<br>no stent<br>placement | 12 (12)                                                                                                                            | 190/99                                     | NR                                                             | 182 (2.1)                                                          | >50 (100)                                                                 | Ostial (46)                                    | NR                                                | NR (3–54<br>months)                  | Decrease, 34/11<br>mm Hg | Creatinine<br>increase, 10<br>μmol/L; 8%<br>developed<br>"renal failure"† | Fair          | Moderate |

|                                           |                     |                                                                                    |         |         |          |           |         |             |           |          |                                                                                                    |                                                                                                            |      |     |
|-------------------------------------------|---------------------|------------------------------------------------------------------------------------|---------|---------|----------|-----------|---------|-------------|-----------|----------|----------------------------------------------------------------------------------------------------|------------------------------------------------------------------------------------------------------------|------|-----|
|                                           |                     | 2 or 3 agents<br>(atenolol,<br>bedrofluazide,<br>calcium-<br>channel<br>blockers)‡ | 16 (16) | 190/101 | NR       | 148 (1.7) |         |             |           |          | Decrease, 8/1<br>mm Hg ( $P <$<br>0.005 [net]);<br>total Rx change<br>not significant<br>(net)     | Creatinine<br>increase, 4<br>$\mu$ mol/L; not<br>significant<br>(net); 7%<br>developed<br>"renal failure"† |      |     |
| Patients<br>with<br>unilateral<br>disease |                     | Angioplasty,<br>no stent<br>placement                                              | 13 (13) | 189/105 | NR       | 138 (1.6) | >50 (0) | Ostial (52) |           |          | Decrease, 2/2<br>mm Hg                                                                             | Creatinine<br>increase, 8<br>$\mu$ mol/L                                                                   |      |     |
|                                           |                     | 2 or 3 agents<br>(atenolol,<br>bedrofluazide,<br>calcium-<br>channel<br>blockers)‡ | 14 (14) | 182/99  | NR       | 168 (1.9) |         |             |           |          | Decrease, 10/2<br>mm Hg (not<br>significant [net]);<br>total Rx change<br>not significant<br>(net) | Creatinine<br>change, 0<br>$\mu$ mol/L; not<br>significant<br>(net)                                        |      |     |
| Plouin et al.,<br>1998 (11)               | Randomized<br>trial | Angioplasty,<br>with or<br>without stent<br>placement                              | 23 (23) | 165/98  | 1.2 (73) | NR        | >60 (0) | Ostial (39) | 1992–1999 | 6 months | Decrease, 14/8<br>mm Hg; total Rx<br>at end, 1.0                                                   | No patient had<br>worsened<br>kidney<br>function;<br>increase in<br>creatinine<br>clearance,<br>0.06 mL/s  | Fair | Low |

|                        |         |        |          |    |  |  |  |  |  |                                                                                                              |                                                                                                                   |
|------------------------|---------|--------|----------|----|--|--|--|--|--|--------------------------------------------------------------------------------------------------------------|-------------------------------------------------------------------------------------------------------------------|
| Multiple drug regimens | 25 (25) | 165/96 | 1.2 (73) | NR |  |  |  |  |  | Decrease, 7/1 mm Hg ( <i>P</i> = not significant/0.04 [net]); total Rx at end, 1.8 ( <i>P</i> = 0.009 [net]) | 1 of 19 patients had worsened kidney function; increase in creatinine clearance, 0.01 mL/s(not significant [net]) |
|------------------------|---------|--------|----------|----|--|--|--|--|--|--------------------------------------------------------------------------------------------------------------|-------------------------------------------------------------------------------------------------------------------|

**Angioplasty versus medical treatment or delayed angioplasty**

|                                                                 |                                                                           |         |         |          |    |         |    |           |        |                                                                                               |                                                                                      |          |      |
|-----------------------------------------------------------------|---------------------------------------------------------------------------|---------|---------|----------|----|---------|----|-----------|--------|-----------------------------------------------------------------------------------------------|--------------------------------------------------------------------------------------|----------|------|
| Krijnen et al., 2004 (12); van Jaarsveld et al., 2000) (13, 14) | Angioplasty, no stent placement                                           | 56 (56) | 179/104 | 1.1 (67) | NR | 76 (23) | NR | 1993–1998 | 1 year | Decrease, 19/12 mm Hg; total Rx decrease, 0.8                                                 | Worsened in 4%; increase in creatinine clearance, 0.05 mL/s                          | Moderate | High |
|                                                                 | Multiple drug regimens (28 patients) or delayed angioplasty (22 patients) | 50 (50) | 180/103 | 1.0 (60) | NR | 72 (22) |    |           |        | Decrease, 17/7 mm Hg (not significant [net]); total Rx decrease, 0.1 ( <i>P</i> = 0.10 [net]) | Worsened in 12%; increase in creatinine clearance, 0.03 mL/s (not significant [net]) |          |      |

**Angioplasty versus medical treatment**

|                           |                            |                                                         |         |         |    |           |          |             |    |                          |                                                                                        |                                                                             |                                                         |     |
|---------------------------|----------------------------|---------------------------------------------------------|---------|---------|----|-----------|----------|-------------|----|--------------------------|----------------------------------------------------------------------------------------|-----------------------------------------------------------------------------|---------------------------------------------------------|-----|
| Webster et al., 1998 (10) | Nonrandomized, prospective | Angioplasty, no stent placement                         | 28 (28) | 196/109 | NR | 169 (1.9) | >50 (NR) | Ostial (63) | NR | 3–54 months              | Decrease, 13/11 mm Hg; total Rx decrease, 0.5 (not significant [net])                  | Creatinine increase, 13 μmol/L                                              | Moderate                                                | Low |
|                           |                            | 2 or 3 agents (bedrofluazid e, calcium-channel blocker) | 51 (51) | 197/103 | NR | 144 (1.6) |          |             |    |                          | Decrease, 12/6 mm Hg; total Rx increase, 0.3 ( <i>P</i> = 0.01 [from baseline])        | Creatinine increase, 5 μmol/L (not significant [net])                       |                                                         |     |
| Taylor et al., 1989 (15)  | Nonrandomized, prospective | Angioplasty, no stent placement                         | 5 (NR)  | 160/96  | NR | NR        | >60 (NR) | NR          | NR | 6.5 months (1–21 months) | Decrease, 23/6 mm Hg; total Rx decrease, 1; no data on change in blood pressure status | Creatinine decrease, 44 μmol/L (including 7 patients who had surgery)       | Poor                                                    | Low |
|                           |                            | No revascularization, 0–3 drugs                         | 15 (NR) | 174/100 | NR | NR        |          |             |    |                          | 13 months (7–20 months)                                                                | Decrease, 24/20 mm Hg; total Rx change, 0; 20% had unchanged blood pressure | Creatinine increase, 88 μmol/L ( <i>P</i> < 0.01 [net]) |     |

|                              |                              |                                    |             |         |    |           |          |    |           |                         |                                                                                                                             |                                                             |      |     |
|------------------------------|------------------------------|------------------------------------|-------------|---------|----|-----------|----------|----|-----------|-------------------------|-----------------------------------------------------------------------------------------------------------------------------|-------------------------------------------------------------|------|-----|
| Englund and Brown, 1991 (16) | Nonrandomized, retrospective | Angioplasty, no stent              | 21 (?19–21) | 165/96  | NR | 341 (3.9) | NR       | NR | 1981–1988 | NR                      | Decrease, 9/5 mm Hg; total Rx decrease, 1; no patient cured of hypertension                                                 | Creatinine increase, 93 $\mu$ mol/L                         | Poor | Low |
|                              |                              | Unspecified drugs                  | 17 (17)     | 185/101 | NR | 332 (3.8) | NR       | NR |           | 16 months (NR)          | Decrease, 24/12 mm Hg (not significant [net]); total Rx change, 0 (not significant [net]); no patient cured of hypertension | Creatinine increase, 61 $\mu$ mol/L (not significant [net]) |      |     |
| Pizzolo et al., 2004 (17)¶   | Retrospective                | Angioplasty, with or without stent | 63 (63)     | 168/95  | NR | 129 (1.5) | ~88 (30) | NR | 1996–2002 | 28 months (1–60 months) | 0% cured of hypertension, 57% improved, 43% unchanged                                                                       | 82% improved, 18% worse                                     | Poor | Low |
|                              |                              | Multiple drug regimens**           | 37 (37)     | 159/91  | NR | 127 (1.4) | ~79 (27) | NR |           |                         | 0% cured of hypertension, 29% improved, 71% unchanged                                                                       | 52% improved, 48% worse                                     |      |     |

#### Angioplasty versus surgery or medical treatment

|                             |                            |                        |           |                |          |           |           |    |                         |                      |                                                                                                                          |                                                                                                      |      |     |
|-----------------------------|----------------------------|------------------------|-----------|----------------|----------|-----------|-----------|----|-------------------------|----------------------|--------------------------------------------------------------------------------------------------------------------------|------------------------------------------------------------------------------------------------------|------|-----|
| Pillay et al., 2002 (18)    | Nonrandomized, prospective | Various procedures ††  | 12 (NR)   | 86 (diastolic) | NR       | 150 (1.7) | >50 (100) | NR | 1994–1998               | 2.5 years (>2 years) | Decrease, 15 mm Hg; total Rx increase, 0.03 $\mu\text{mol/L}$ ( $P = 0.01$ [from baseline]); 1 patient required dialysis | Creatinine increase, 53 $\mu\text{mol/L}$ ( $P = 0.01$ [from baseline]); 1 patient required dialysis | Poor | Low |
|                             |                            | Unspecified drugs      | 21 (NR)   | 90 (diastolic) | NR       | 110 (1.2) |           |    |                         |                      | Decrease, 6 mm Hg (not significant [net]); total Rx increase, 0.13 (not significant [net])                               | No creatinine change (not significant [from baseline]); no patient required dialysis                 |      |     |
| Johansson et al., 1999 (19) | Nonrandomized, prospective | Various procedures ††† | 105 (~91) | 179/91         | 1.0 (61) | –         | 50 (NR)   | NR | 1983–1984 and 1988–1994 | 7.1 years (NR)       | 53% cured of hypertension at 1 year                                                                                      | NR                                                                                                   | Poor | Low |
|                             |                            | Unspecified drugs      | 64 (~56)  | NR             | NR       | NR        |           |    |                         |                      | NR                                                                                                                       | NR                                                                                                   |      |     |

**Surgery versus medical treatment**

|                             |                     |                      |         |    |    |    |         |    |    |                                 |                                                                      |                                                                                                                        |      |     |
|-----------------------------|---------------------|----------------------|---------|----|----|----|---------|----|----|---------------------------------|----------------------------------------------------------------------|------------------------------------------------------------------------------------------------------------------------|------|-----|
| Uzzo et al.,<br>2002 (20)§§ | Randomized<br>trial | Surgery              | 25 (25) | NR | NR | NR | 75 (NR) | NR | NR | 6.2 years<br>(up to 7<br>years) | No difference in<br>"blood pressure<br>control" (not<br>significant) | No difference<br>in dialysis-free<br>survival or<br>change in<br>glomerular<br>filtration rate<br>(not<br>significant) | Poor | Low |
|                             |                     | Unspecified<br>drugs | 27 (27) | NR | NR | NR |         |    |    |                                 |                                                                      |                                                                                                                        |      |     |

\*NR = not reported; Rx = prescriptions.

†Among participants with both unilateral and bilateral renal artery stenosis, congestive heart failure occurred in 9% of those who received angioplasty and 13% of those who received medical treatment alone, and stroke occurred in 4% and 13%, respectively. Myocardial infarction occurred in 4% of patients who received angioplasty and in an unclear proportion of those who received medical treatment alone.

‡Alternatively, patients received furosemide, methyldopa, or prazosin. Angiotensin-converting enzyme inhibitors were not allowed.

§Target diastolic blood pressure < 95 mm Hg; if necessary, atenolol (50 mg), furosemide (40 mg), or enalapril (10 mg) was used.

||Twenty-two of 50 patients assigned to medical therapy received angioplasty at 3 months because of persistent hypertension or deterioration of kidney function.

These patients were originally assigned to receive amlodipine, 10 mg (plus atenolol, 50 mg if > 40 years of age) or enalapril, 20 mg (plus hydrochlorothiazide, 25 mg if > 40 years of age) or, if neither regimen was tolerated, atenolol, 100 mg (plus hydrochlorothiazide, 25 mg if > 40 years of age).

¶¶Entry criteria differed markedly for patients receiving angioplasty and those receiving medical therapy. Patients receiving angioplasty had primary evaluation for resistant hypertension or unexplained azotemia. Patients receiving conservative therapy had angiographic evaluation for other causes, primarily lower extremity arteriopathy. Endovascular therapy not considered for this latter group.

\*\*Goal blood pressure  $\leq$  140/90 mm Hg. The most frequently used classes of drugs were angiotensin-converting enzyme inhibitors (62% of patients), diuretics (62%), calcium antagonists (49%), and  $\beta$ -blockers (30%).

††Among 12 patients, “9 [had] angioplasties (1 failure) and 1 [had] bilateral stent. 4 kidneys had... surgery.”

‡‡Eighty-eight patients had angioplasty and 17 had reconstructive surgery or nephrectomy.

§§The stopping point (diastolic blood pressure  $>$  100 mm Hg during treatment or worsening kidney function (including need for dialysis) or occurrence of an atherosclerotic cardiovascular event or death) was reached in 68% of patients after surgery and 67% of those receiving medical treatment (not statistically significant).
