# Supplementary material
Source: HighWire-hosted journal article supplement (https://www.annals.org/content/suppl/2006/10/16/0000605-200612190-00143v1)
Supplement: M61704.05_T4.pdf [file M61704.05_T4.pdf]

**Table 4. Baseline Factors as Predictors of Treatment Outcomes**

| Baseline Factor  | Treatment         | Strength<br>of Evidence | Studies (Participants), <i>n</i> |                                                      | Conclusions                                                                                                                                                                                                 |
|------------------|-------------------|-------------------------|----------------------------------|------------------------------------------------------|-------------------------------------------------------------------------------------------------------------------------------------------------------------------------------------------------------------|
|                  |                   |                         | Randomized<br>Trials             | Other<br>Comparative<br>Studies<br>Cohort<br>Studies |                                                                                                                                                                                                             |
| Diagnostic tests | Revascularization | Weak                    | 1 (106)                          | 2 (354)                                              | Captopril testing and renography (scintigraphy) did not predict outcomes after angioplasty (1 study); disagreement about whether elevated resistance index predicted outcomes after angioplasty (2 studies) |
|                  | Medical treatment | Weak                    |                                  | 1 (45)                                               | Nonspiral flow on magnetic resonance angiography predicted progression of kidney function worsening                                                                                                         |

|                                               |                                            |      |        |          |                                                                                                                                                                           |
|-----------------------------------------------|--------------------------------------------|------|--------|----------|---------------------------------------------------------------------------------------------------------------------------------------------------------------------------|
| Bilateral disease (versus unilateral disease) | Revascularization versus medical treatment | Weak | 1 (55) | 1 (106)  | Greater blood pressure improvement and possibly better kidney function after angioplasty compared with medical treatment, in contrast to patients with unilateral disease |
|                                               | Revascularization                          | Weak |        | 7 (1999) | Disagreement about whether patients with bilateral disease had reduced a mortality rate or better kidney and blood pressure outcomes                                      |
|                                               | Medical treatment                          | Weak |        | 2 (116)  | No difference in kidney outcomes, but higher mortality rate with bilateral disease                                                                                        |
| Baseline kidney function                      | Revascularization vs. medical treatment    | Weak |        | 1 (52)   | Among patients with elevated serum creatinine concentrations, surgical revascularization resulted in lower a mortality rate than did medical treatment alone              |

|                           |                   |            |        |         |           |                                                                                                                                                                                                                                                                                                 |
|---------------------------|-------------------|------------|--------|---------|-----------|-------------------------------------------------------------------------------------------------------------------------------------------------------------------------------------------------------------------------------------------------------------------------------------------------|
|                           | Revascularization | Acceptable |        | 2 (269) | 12 (2246) | Poorer kidney function predicted a higher mortality rate, poorer clinical outcomes (including cardiovascular events), and poorer blood pressure control after angioplasty; studies disagreed about whether baseline kidney function predicted improvements in kidney function after angioplasty |
|                           | Medical treatment | Weak       |        | 1 (52)  | 1 (26)    | Poorer kidney function predicted higher mortality and dialysis rates but not changes in blood pressure                                                                                                                                                                                          |
| Baseline percent stenosis | Revascularization | Weak       | 1 (55) | 2 (185) | 2 (471)   | Disagreement about whether percent stenosis predicted blood pressure or kidney outcomes after angioplasty                                                                                                                                                                                       |
|                           | Medical treatment | Weak       | 1 (55) | 1 (52)  | 1 (362)   | Reduced survival, but no effect on blood pressure or kidney function                                                                                                                                                                                                                            |

|                                       |                   |            |        |         |          |                                                                                                                  |
|---------------------------------------|-------------------|------------|--------|---------|----------|------------------------------------------------------------------------------------------------------------------|
| Baseline<br>cardiovascular<br>disease | Revascularization | Acceptable |        | 2 (269) | 5 (1454) | Patients with cardiovascular disease had increased mortality rates and worse kidney function after angioplasty   |
|                                       | Medical treatment | Weak       |        | 2 (269) | 1 (362)  | Disagreement about whether cardiovascular disease predicts death                                                 |
| Demographic<br>characteristics        | Revascularization | Weak       | 1 (55) | 3 (348) | 2 (561)  | Disagreement about whether outcomes differed by sex or age of patients                                           |
|                                       | Medical treatment | Weak       | 1 (55) | 3 (348) | 1 (362)  | Disagreement about whether outcomes differed by sex or age of patients                                           |
| Stent placement                       | Revascularization | Weak       |        |         | 2 (269)  | No difference in blood pressure and kidney outcomes between patients who had stents placed and those who did not |
